# Supplementary material
Source: publisher figshare collection journal article supplement (https://acs.figshare.com/ndownloader/files/4773877)
Supplement: Supplementary file 1 [file 4773877]

 
data_str762m 
 
_audit_creation_method            SHELXL-97 
_chemical_name_systematic 
; 
 ? 
; 
_chemical_name_common             ? 
_chemical_melting_point           ? 
_chemical_formula_moiety          ? 
_chemical_formula_sum 
 'C27 H30 I Ir N2' 
_chemical_formula_weight          701.63 
 
loop_ 
 _atom_type_symbol 
 _atom_type_description 
 _atom_type_scat_dispersion_real 
 _atom_type_scat_dispersion_imag 
 _atom_type_scat_source 
 'C'  'C'   0.0033   0.0016 
 'International Tables Vol C Tables 4.2.6.8 and 6.1.1.4' 
 'H'  'H'   0.0000   0.0000 
 'International Tables Vol C Tables 4.2.6.8 and 6.1.1.4' 
 'N'  'N'   0.0061   0.0033 
 'International Tables Vol C Tables 4.2.6.8 and 6.1.1.4' 
 'I'  'I'  -0.4742   1.8119 
 'International Tables Vol C Tables 4.2.6.8 and 6.1.1.4' 
 'Ir'  'Ir'  -1.4442   7.9887 
 'International Tables Vol C Tables 4.2.6.8 and 6.1.1.4' 
 
_symmetry_cell_setting            monoclinic 
_symmetry_space_group_name_H-M    P2(1)/c 
 
loop_ 
 _symmetry_equiv_pos_as_xyz 
 'x, y, z' 
 '-x, y+1/2, -z+1/2' 
 '-x, -y, -z' 
 'x, -y-1/2, z-1/2' 
 
_cell_length_a                    11.3533(9) 
_cell_length_b                    8.4587(6) 
_cell_length_c                    26.431(2) 
_cell_angle_alpha                 90.00 
_cell_angle_beta                  98.643(2) 
_cell_angle_gamma                 90.00 
_cell_volume                      2509.5(3) 
_cell_formula_units_Z             4 
_cell_measurement_temperature     273(2) 
_cell_measurement_reflns_used     4042 
_cell_measurement_theta_min       2.21 
_cell_measurement_theta_max       27.51 
 
_exptl_crystal_description        prism 
_exptl_crystal_colour             yellow 
_exptl_crystal_size_max           0.25 
_exptl_crystal_size_mid           0.23 
_exptl_crystal_size_min           0.20 
_exptl_crystal_density_meas       ? 
_exptl_crystal_density_diffrn     1.857 
_exptl_crystal_density_method     'not measured' 
_exptl_crystal_F_000              1344 
_exptl_absorpt_coefficient_mu     6.567 
_exptl_absorpt_correction_type    'multi-scan' 
_exptl_absorpt_correction_T_min   0.2208 
_exptl_absorpt_correction_T_max   0.2685 
_exptl_absorpt_process_details    SADABS 
 
_exptl_special_details 
; 
 ? 
; 
 
_diffrn_ambient_temperature       273(2) 
_diffrn_radiation_wavelength      0.71073 
_diffrn_radiation_type            MoK\a 
_diffrn_radiation_source          'fine-focus sealed tube' 
_diffrn_radiation_monochromator   graphite 
_diffrn_measurement_device_type   'CCD area detector' 
_diffrn_measurement_method        'phi and omega scans' 
_diffrn_detector_area_resol_mean  ? 
_diffrn_standards_number          ? 
_diffrn_standards_interval_count  ? 
_diffrn_standards_interval_time   ? 
_diffrn_standards_decay_%         ? 
_diffrn_reflns_number             16563 
_diffrn_reflns_av_R_equivalents   0.0325 
_diffrn_reflns_av_sigmaI/netI     0.0365 
_diffrn_reflns_limit_h_min        -14 
_diffrn_reflns_limit_h_max        14 
_diffrn_reflns_limit_k_min        -11 
_diffrn_reflns_limit_k_max        10 
_diffrn_reflns_limit_l_min        -25 
_diffrn_reflns_limit_l_max        34 
_diffrn_reflns_theta_min          1.56 
_diffrn_reflns_theta_max          27.52 
_reflns_number_total              5676 
_reflns_number_gt                 4642 
_reflns_threshold_expression      >2sigma(I) 
 
_computing_data_collection        'Bruker SMART' 
_computing_cell_refinement        'Bruker SMART' 
_computing_data_reduction         'Bruker SAINT' 
_computing_structure_solution     'SHELXS-97 (Sheldrick, 1990)' 
_computing_structure_refinement   'SHELXL-97 (Sheldrick, 1997)' 
_computing_molecular_graphics     'Bruker SHELXTL' 
_computing_publication_material   'Bruker SHELXTL' 
 
_refine_special_details 
; 
 Refinement of F^2^ against ALL reflections.  The weighted R-factor wR and 
 goodness of fit S are based on F^2^, conventional R-factors R are based 
 on F, with F set to zero for negative F^2^. The threshold expression of 
 F^2^ > 2sigma(F^2^) is used only for calculating R-factors(gt) etc. and is 
 not relevant to the choice of reflections for refinement.  R-factors based 
 on F^2^ are statistically about twice as large as those based on F, and R- 
 factors based on ALL data will be even larger. 
; 
 
_refine_ls_structure_factor_coef  Fsqd  
_refine_ls_matrix_type            full 
_refine_ls_weighting_scheme       calc  
_refine_ls_weighting_details 
 'calc w=1/[\s^2^(Fo^2^)+(0.0152P)^2^+2.5129P] where P=(Fo^2^+2Fc^2^)/3' 
_atom_sites_solution_primary      direct 
_atom_sites_solution_secondary    difmap 
_atom_sites_solution_hydrogens    geom 
_refine_ls_hydrogen_treatment     constr 
_refine_ls_extinction_method      none 
_refine_ls_extinction_coef        ? 
_refine_ls_number_reflns          5676 
_refine_ls_number_parameters      286 
_refine_ls_number_restraints      0 
_refine_ls_R_factor_all           0.0392 
_refine_ls_R_factor_gt            0.0262 
_refine_ls_wR_factor_ref          0.0549 
_refine_ls_wR_factor_gt           0.0512 
_refine_ls_goodness_of_fit_ref    1.037 
_refine_ls_restrained_S_all       1.037 
_refine_ls_shift/su_max           0.002 
_refine_ls_shift/su_mean          0.000 
 
loop_ 
 _atom_site_label 
 _atom_site_type_symbol 
 _atom_site_fract_x 
 _atom_site_fract_y 
 _atom_site_fract_z 
 _atom_site_U_iso_or_equiv 
 _atom_site_adp_type 
 _atom_site_occupancy 
 _atom_site_symmetry_multiplicity 
 _atom_site_calc_flag 
 _atom_site_refinement_flags 
 _atom_site_disorder_assembly 
 _atom_site_disorder_group 
Ir1 Ir 0.796756(13) 0.149122(18) 0.101020(6) 0.03164(5) Uani 1 1 d . . . 
C1 C 0.7843(3) 0.0496(4) 0.16869(14) 0.0311(8) Uani 1 1 d . . . 
N1 N 0.8727(3) 0.0133(4) 0.20783(13) 0.0417(8) Uani 1 1 d . . . 
I2 I 0.87960(3) 0.42244(4) 0.146154(12) 0.05261(9) Uani 1 1 d . . . 
N2 N 0.6843(3) -0.0123(4) 0.18325(12) 0.0359(7) Uani 1 1 d . . . 
C2 C 0.9972(4) 0.0574(7) 0.21187(19) 0.0611(14) Uani 1 1 d . . . 
H2A H 1.0095 0.1161 0.1820 0.092 Uiso 1 1 calc R . . 
H2B H 1.0455 -0.0362 0.2145 0.092 Uiso 1 1 calc R . . 
H2C H 1.0189 0.1216 0.2418 0.092 Uiso 1 1 calc R . . 
C3 C 0.8277(4) -0.0737(5) 0.24515(17) 0.0486(11) Uani 1 1 d . . . 
H3 H 0.8707 -0.1127 0.2753 0.058 Uiso 1 1 calc R . . 
C4 C 0.7117(4) -0.0907(5) 0.22970(16) 0.0458(10) Uani 1 1 d . . . 
H4 H 0.6585 -0.1451 0.2468 0.055 Uiso 1 1 calc R . . 
C5 C 0.5665(3) -0.0117(5) 0.14992(15) 0.0373(9) Uani 1 1 d . . . 
H5 H 0.5714 -0.0869 0.1221 0.045 Uiso 1 1 calc R . . 
C10 C 0.6278(3) 0.2319(5) 0.10312(14) 0.0357(9) Uani 1 1 d . . . 
C11 C 0.5924(4) 0.3739(5) 0.07803(18) 0.0496(11) Uani 1 1 d . . . 
H11 H 0.6487 0.4303 0.0632 0.059 Uiso 1 1 calc R . . 
C12 C 0.4792(5) 0.4345(6) 0.0742(2) 0.0651(14) Uani 1 1 d . . . 
H12 H 0.4598 0.5291 0.0570 0.078 Uiso 1 1 calc R . . 
C13 C 0.3946(4) 0.3529(6) 0.0961(2) 0.0652(14) Uani 1 1 d . . . 
H13 H 0.3174 0.3920 0.0937 0.078 Uiso 1 1 calc R . . 
C14 C 0.4247(4) 0.2139(6) 0.12157(18) 0.0508(11) Uani 1 1 d . . . 
H14 H 0.3674 0.1602 0.1366 0.061 Uiso 1 1 calc R . . 
C15 C 0.5399(3) 0.1508(5) 0.12544(15) 0.0373(9) Uani 1 1 d . . . 
C21 C 0.4711(3) -0.0714(5) 0.17956(17) 0.0432(10) Uani 1 1 d . . . 
C22 C 0.4063(4) -0.2037(6) 0.16187(18) 0.0511(11) Uani 1 1 d . . . 
H22 H 0.4236 -0.2574 0.1332 0.061 Uiso 1 1 calc R . . 
C23 C 0.3145(4) -0.2560(7) 0.1875(2) 0.0646(15) Uani 1 1 d . . . 
H23 H 0.2689 -0.3430 0.1750 0.077 Uiso 1 1 calc R . . 
C24 C 0.2911(5) -0.1810(7) 0.2304(2) 0.0687(16) Uani 1 1 d . . . 
H24 H 0.2309 -0.2183 0.2475 0.082 Uiso 1 1 calc R . . 
C25 C 0.3562(5) -0.0500(7) 0.2487(2) 0.0671(15) Uani 1 1 d . . . 
H25 H 0.3405 0.0005 0.2782 0.081 Uiso 1 1 calc R . . 
C26 C 0.4450(4) 0.0059(6) 0.22279(19) 0.0586(13) Uani 1 1 d . . . 
H26 H 0.4875 0.0960 0.2345 0.070 Uiso 1 1 calc R . . 
C31 C 0.9538(4) 0.1175(6) 0.05803(19) 0.0563(13) Uani 1 1 d . . . 
C32 C 0.9153(4) -0.0318(6) 0.07131(17) 0.0495(11) Uani 1 1 d . . . 
C33 C 0.7915(4) -0.0485(5) 0.04888(16) 0.0425(10) Uani 1 1 d . . . 
C34 C 0.7604(4) 0.0915(5) 0.01802(16) 0.0472(11) Uani 1 1 d . . . 
C35 C 0.8572(5) 0.1955(6) 0.02540(18) 0.0555(12) Uani 1 1 d . . . 
C41 C 1.0777(5) 0.1846(8) 0.0707(3) 0.095(2) Uani 1 1 d . . . 
H41A H 1.1252 0.1165 0.0946 0.143 Uiso 1 1 calc R . . 
H41B H 1.0737 0.2878 0.0855 0.143 Uiso 1 1 calc R . . 
H41C H 1.1131 0.1925 0.0400 0.143 Uiso 1 1 calc R . . 
C42 C 0.9866(5) -0.1589(7) 0.1008(2) 0.0823(19) Uani 1 1 d . . . 
H42A H 0.9985 -0.2444 0.0783 0.123 Uiso 1 1 calc R . . 
H42B H 0.9446 -0.1969 0.1274 0.123 Uiso 1 1 calc R . . 
H42C H 1.0624 -0.1171 0.1159 0.123 Uiso 1 1 calc R . . 
C43 C 0.7205(5) -0.1978(6) 0.0471(2) 0.0622(13) Uani 1 1 d . . . 
H43A H 0.7460 -0.2687 0.0225 0.093 Uiso 1 1 calc R . . 
H43B H 0.6375 -0.1740 0.0374 0.093 Uiso 1 1 calc R . . 
H43C H 0.7325 -0.2467 0.0803 0.093 Uiso 1 1 calc R . . 
C44 C 0.6439(5) 0.1150(7) -0.0166(2) 0.0771(17) Uani 1 1 d . . . 
H44A H 0.6502 0.2041 -0.0386 0.116 Uiso 1 1 calc R . . 
H44B H 0.5819 0.1341 0.0036 0.116 Uiso 1 1 calc R . . 
H44C H 0.6253 0.0220 -0.0371 0.116 Uiso 1 1 calc R . . 
C45 C 0.8628(7) 0.3578(7) 0.0009(2) 0.095(2) Uani 1 1 d . . . 
H45A H 0.8544 0.3464 -0.0356 0.143 Uiso 1 1 calc R . . 
H45B H 0.9381 0.4064 0.0132 0.143 Uiso 1 1 calc R . . 
H45C H 0.7995 0.4228 0.0095 0.143 Uiso 1 1 calc R . . 
 
loop_ 
 _atom_site_aniso_label 
 _atom_site_aniso_U_11 
 _atom_site_aniso_U_22 
 _atom_site_aniso_U_33 
 _atom_site_aniso_U_23 
 _atom_site_aniso_U_13 
 _atom_site_aniso_U_12 
Ir1 0.02985(8) 0.03489(8) 0.03078(8) -0.00024(7) 0.00646(5) -0.00446(7) 
C1 0.0296(19) 0.033(2) 0.0296(19) -0.0004(16) 0.0019(15) 0.0017(15) 
N1 0.0342(18) 0.050(2) 0.0389(19) 0.0098(16) 0.0009(15) 0.0051(15) 
I2 0.06104(19) 0.04551(17) 0.04917(18) -0.00766(14) 0.00145(14) -0.01408(14) 
N2 0.0345(18) 0.0380(18) 0.0361(18) 0.0054(14) 0.0082(14) 0.0030(14) 
C2 0.038(2) 0.080(4) 0.061(3) 0.016(3) -0.007(2) -0.006(2) 
C3 0.051(3) 0.051(3) 0.044(3) 0.013(2) 0.006(2) 0.012(2) 
C4 0.049(3) 0.049(3) 0.042(2) 0.014(2) 0.014(2) 0.000(2) 
C5 0.034(2) 0.038(2) 0.040(2) -0.0019(18) 0.0074(17) -0.0030(17) 
C10 0.033(2) 0.040(2) 0.033(2) -0.0011(17) 0.0036(16) 0.0037(17) 
C11 0.047(3) 0.047(3) 0.054(3) 0.011(2) 0.006(2) 0.005(2) 
C12 0.058(3) 0.056(3) 0.077(4) 0.014(3) -0.003(3) 0.018(3) 
C13 0.041(3) 0.070(3) 0.082(4) 0.006(3) 0.001(3) 0.013(3) 
C14 0.030(2) 0.061(3) 0.062(3) 0.007(2) 0.009(2) 0.001(2) 
C15 0.0291(19) 0.042(2) 0.039(2) 0.0020(19) 0.0020(16) 0.0014(17) 
C21 0.032(2) 0.048(3) 0.050(3) 0.007(2) 0.0083(18) -0.0035(19) 
C22 0.049(3) 0.052(3) 0.050(3) 0.008(2) 0.002(2) -0.013(2) 
C23 0.052(3) 0.067(4) 0.074(4) 0.021(3) 0.004(3) -0.023(3) 
C24 0.047(3) 0.078(4) 0.086(4) 0.032(3) 0.025(3) -0.003(3) 
C25 0.060(3) 0.079(4) 0.070(4) 0.009(3) 0.036(3) 0.008(3) 
C26 0.049(3) 0.065(3) 0.066(3) -0.005(3) 0.026(2) -0.007(2) 
C31 0.047(3) 0.069(3) 0.060(3) -0.019(3) 0.029(2) -0.014(2) 
C32 0.040(2) 0.058(3) 0.052(3) -0.012(2) 0.014(2) 0.007(2) 
C33 0.049(2) 0.043(2) 0.038(2) -0.0106(19) 0.0140(19) -0.0040(19) 
C34 0.063(3) 0.046(2) 0.033(2) -0.0031(19) 0.009(2) -0.002(2) 
C35 0.077(3) 0.053(3) 0.043(3) -0.003(2) 0.032(2) -0.013(3) 
C41 0.049(3) 0.121(6) 0.126(6) -0.040(4) 0.044(3) -0.034(3) 
C42 0.070(4) 0.077(4) 0.096(5) -0.014(3) -0.001(3) 0.036(3) 
C43 0.069(3) 0.051(3) 0.067(3) -0.013(2) 0.013(3) -0.012(3) 
C44 0.094(4) 0.079(4) 0.050(3) -0.003(3) -0.016(3) 0.004(3) 
C45 0.160(7) 0.065(4) 0.075(4) 0.010(3) 0.065(4) -0.027(4) 
 
_geom_special_details 
; 
 All esds (except the esd in the dihedral angle between two l.s. planes) 
 are estimated using the full covariance matrix.  The cell esds are taken 
 into account individually in the estimation of esds in distances, angles 
 and torsion angles; correlations between esds in cell parameters are only 
 used when they are defined by crystal symmetry.  An approximate (isotropic) 
 treatment of cell esds is used for estimating esds involving l.s. planes. 
; 
 
loop_ 
 _geom_bond_atom_site_label_1 
 _geom_bond_atom_site_label_2 
 _geom_bond_distance 
 _geom_bond_site_symmetry_2 
 _geom_bond_publ_flag 
Ir1 C1 2.001(4) . ? 
Ir1 C10 2.050(4) . ? 
Ir1 C33 2.162(4) . ? 
Ir1 C34 2.225(4) . ? 
Ir1 C35 2.243(4) . ? 
Ir1 C32 2.255(4) . ? 
Ir1 C31 2.270(4) . ? 
Ir1 I2 2.7047(3) . ? 
C1 N2 1.357(5) . ? 
C1 N1 1.364(4) . ? 
N1 C3 1.388(5) . ? 
N1 C2 1.450(5) . ? 
N2 C4 1.389(5) . ? 
N2 C5 1.486(5) . ? 
C3 C4 1.326(6) . ? 
C5 C21 1.516(5) . ? 
C5 C15 1.530(6) . ? 
C10 C11 1.402(6) . ? 
C10 C15 1.412(5) . ? 
C11 C12 1.373(6) . ? 
C12 C13 1.380(7) . ? 
C13 C14 1.372(7) . ? 
C14 C15 1.402(5) . ? 
C21 C22 1.381(6) . ? 
C21 C26 1.387(6) . ? 
C22 C23 1.397(6) . ? 
C23 C24 1.361(8) . ? 
C24 C25 1.379(8) . ? 
C25 C26 1.384(6) . ? 
C31 C32 1.399(7) . ? 
C31 C35 1.449(7) . ? 
C31 C41 1.507(7) . ? 
C32 C33 1.448(6) . ? 
C32 C42 1.493(7) . ? 
C33 C34 1.451(6) . ? 
C33 C43 1.495(6) . ? 
C34 C35 1.398(6) . ? 
C34 C44 1.505(7) . ? 
C35 C45 1.524(7) . ? 
 
loop_ 
 _geom_angle_atom_site_label_1 
 _geom_angle_atom_site_label_2 
 _geom_angle_atom_site_label_3 
 _geom_angle 
 _geom_angle_site_symmetry_1 
 _geom_angle_site_symmetry_3 
 _geom_angle_publ_flag 
C1 Ir1 C10 85.83(15) . . ? 
C1 Ir1 C33 104.22(15) . . ? 
C10 Ir1 C33 110.18(16) . . ? 
C1 Ir1 C34 139.62(16) . . ? 
C10 Ir1 C34 93.79(16) . . ? 
C33 Ir1 C34 38.60(16) . . ? 
C1 Ir1 C35 160.44(17) . . ? 
C10 Ir1 C35 112.14(18) . . ? 
C33 Ir1 C35 63.26(17) . . ? 
C34 Ir1 C35 36.47(17) . . ? 
C1 Ir1 C32 98.73(16) . . ? 
C10 Ir1 C32 148.28(16) . . ? 
C33 Ir1 C32 38.20(16) . . ? 
C34 Ir1 C32 62.60(17) . . ? 
C35 Ir1 C32 61.98(18) . . ? 
C1 Ir1 C31 124.36(18) . . ? 
C10 Ir1 C31 149.58(18) . . ? 
C33 Ir1 C31 62.50(16) . . ? 
C34 Ir1 C31 61.55(18) . . ? 
C35 Ir1 C31 37.45(18) . . ? 
C32 Ir1 C31 36.00(17) . . ? 
C1 Ir1 I2 91.84(10) . . ? 
C10 Ir1 I2 87.76(11) . . ? 
C33 Ir1 I2 156.45(11) . . ? 
C34 Ir1 I2 128.53(12) . . ? 
C35 Ir1 I2 96.36(12) . . ? 
C32 Ir1 I2 123.19(12) . . ? 
C31 Ir1 I2 94.26(12) . . ? 
N2 C1 N1 104.5(3) . . ? 
N2 C1 Ir1 126.2(3) . . ? 
N1 C1 Ir1 129.0(3) . . ? 
C1 N1 C3 110.6(3) . . ? 
C1 N1 C2 126.6(4) . . ? 
C3 N1 C2 122.9(3) . . ? 
C1 N2 C4 110.4(3) . . ? 
C1 N2 C5 123.1(3) . . ? 
C4 N2 C5 126.0(3) . . ? 
C4 C3 N1 107.0(4) . . ? 
C3 C4 N2 107.5(4) . . ? 
N2 C5 C21 110.0(3) . . ? 
N2 C5 C15 110.9(3) . . ? 
C21 C5 C15 114.0(3) . . ? 
C11 C10 C15 116.3(4) . . ? 
C11 C10 Ir1 118.9(3) . . ? 
C15 C10 Ir1 124.6(3) . . ? 
C12 C11 C10 123.6(5) . . ? 
C11 C12 C13 119.0(5) . . ? 
C14 C13 C12 119.8(4) . . ? 
C13 C14 C15 121.5(4) . . ? 
C14 C15 C10 119.7(4) . . ? 
C14 C15 C5 119.7(4) . . ? 
C10 C15 C5 120.4(3) . . ? 
C22 C21 C26 119.5(4) . . ? 
C22 C21 C5 118.7(4) . . ? 
C26 C21 C5 121.8(4) . . ? 
C21 C22 C23 119.4(5) . . ? 
C24 C23 C22 120.6(5) . . ? 
C23 C24 C25 120.4(5) . . ? 
C24 C25 C26 119.5(5) . . ? 
C25 C26 C21 120.5(5) . . ? 
C32 C31 C35 108.8(4) . . ? 
C32 C31 C41 127.0(5) . . ? 
C35 C31 C41 124.0(5) . . ? 
C32 C31 Ir1 71.4(2) . . ? 
C35 C31 Ir1 70.3(2) . . ? 
C41 C31 Ir1 128.4(4) . . ? 
C31 C32 C33 107.9(4) . . ? 
C31 C32 C42 128.0(5) . . ? 
C33 C32 C42 124.1(5) . . ? 
C31 C32 Ir1 72.6(3) . . ? 
C33 C32 Ir1 67.4(2) . . ? 
C42 C32 Ir1 127.7(4) . . ? 
C32 C33 C34 106.8(4) . . ? 
C32 C33 C43 125.5(4) . . ? 
C34 C33 C43 126.0(4) . . ? 
C32 C33 Ir1 74.4(2) . . ? 
C34 C33 Ir1 73.0(2) . . ? 
C43 C33 Ir1 129.5(3) . . ? 
C35 C34 C33 108.4(4) . . ? 
C35 C34 C44 127.0(5) . . ? 
C33 C34 C44 124.6(4) . . ? 
C35 C34 Ir1 72.5(3) . . ? 
C33 C34 Ir1 68.4(2) . . ? 
C44 C34 Ir1 126.0(4) . . ? 
C34 C35 C31 107.8(4) . . ? 
C34 C35 C45 126.2(5) . . ? 
C31 C35 C45 126.0(5) . . ? 
C34 C35 Ir1 71.0(2) . . ? 
C31 C35 Ir1 72.3(3) . . ? 
C45 C35 Ir1 125.1(3) . . ? 
 
loop_ 
 _geom_torsion_atom_site_label_1 
 _geom_torsion_atom_site_label_2 
 _geom_torsion_atom_site_label_3 
 _geom_torsion_atom_site_label_4 
 _geom_torsion 
 _geom_torsion_site_symmetry_1 
 _geom_torsion_site_symmetry_2 
 _geom_torsion_site_symmetry_3 
 _geom_torsion_site_symmetry_4 
 _geom_torsion_publ_flag 
C10 Ir1 C1 N2 35.1(3) . . . . ? 
C33 Ir1 C1 N2 -74.7(3) . . . . ? 
C34 Ir1 C1 N2 -55.9(4) . . . . ? 
C35 Ir1 C1 N2 -122.4(5) . . . . ? 
C32 Ir1 C1 N2 -113.3(3) . . . . ? 
C31 Ir1 C1 N2 -140.9(3) . . . . ? 
I2 Ir1 C1 N2 122.7(3) . . . . ? 
C10 Ir1 C1 N1 -152.5(4) . . . . ? 
C33 Ir1 C1 N1 97.8(4) . . . . ? 
C34 Ir1 C1 N1 116.6(4) . . . . ? 
C35 Ir1 C1 N1 50.1(7) . . . . ? 
C32 Ir1 C1 N1 59.1(4) . . . . ? 
C31 Ir1 C1 N1 31.6(4) . . . . ? 
I2 Ir1 C1 N1 -64.9(3) . . . . ? 
N2 C1 N1 C3 1.7(4) . . . . ? 
Ir1 C1 N1 C3 -172.0(3) . . . . ? 
N2 C1 N1 C2 -177.9(4) . . . . ? 
Ir1 C1 N1 C2 8.4(6) . . . . ? 
N1 C1 N2 C4 -2.3(4) . . . . ? 
Ir1 C1 N2 C4 171.7(3) . . . . ? 
N1 C1 N2 C5 -175.0(3) . . . . ? 
Ir1 C1 N2 C5 -1.0(5) . . . . ? 
C1 N1 C3 C4 -0.5(5) . . . . ? 
C2 N1 C3 C4 179.1(4) . . . . ? 
N1 C3 C4 N2 -0.9(5) . . . . ? 
C1 N2 C4 C3 2.1(5) . . . . ? 
C5 N2 C4 C3 174.5(4) . . . . ? 
C1 N2 C5 C21 -173.3(4) . . . . ? 
C4 N2 C5 C21 15.2(5) . . . . ? 
C1 N2 C5 C15 -46.3(5) . . . . ? 
C4 N2 C5 C15 142.2(4) . . . . ? 
C1 Ir1 C10 C11 151.1(3) . . . . ? 
C33 Ir1 C10 C11 -105.2(3) . . . . ? 
C34 Ir1 C10 C11 -69.3(3) . . . . ? 
C35 Ir1 C10 C11 -36.8(4) . . . . ? 
C32 Ir1 C10 C11 -109.0(4) . . . . ? 
C31 Ir1 C10 C11 -35.5(5) . . . . ? 
I2 Ir1 C10 C11 59.1(3) . . . . ? 
C1 Ir1 C10 C15 -33.2(3) . . . . ? 
C33 Ir1 C10 C15 70.4(4) . . . . ? 
C34 Ir1 C10 C15 106.3(3) . . . . ? 
C35 Ir1 C10 C15 138.8(3) . . . . ? 
C32 Ir1 C10 C15 66.7(5) . . . . ? 
C31 Ir1 C10 C15 140.2(4) . . . . ? 
I2 Ir1 C10 C15 -125.2(3) . . . . ? 
C15 C10 C11 C12 -0.4(7) . . . . ? 
Ir1 C10 C11 C12 175.5(4) . . . . ? 
C10 C11 C12 C13 0.2(8) . . . . ? 
C11 C12 C13 C14 0.4(8) . . . . ? 
C12 C13 C14 C15 -0.7(8) . . . . ? 
C13 C14 C15 C10 0.5(7) . . . . ? 
C13 C14 C15 C5 -174.5(4) . . . . ? 
C11 C10 C15 C14 0.1(6) . . . . ? 
Ir1 C10 C15 C14 -175.7(3) . . . . ? 
C11 C10 C15 C5 175.0(4) . . . . ? 
Ir1 C10 C15 C5 -0.7(5) . . . . ? 
N2 C5 C15 C14 -139.1(4) . . . . ? 
C21 C5 C15 C14 -14.4(5) . . . . ? 
N2 C5 C15 C10 45.9(5) . . . . ? 
C21 C5 C15 C10 170.7(4) . . . . ? 
N2 C5 C21 C22 -120.6(4) . . . . ? 
C15 C5 C21 C22 114.1(4) . . . . ? 
N2 C5 C21 C26 61.4(5) . . . . ? 
C15 C5 C21 C26 -63.8(5) . . . . ? 
C26 C21 C22 C23 0.9(7) . . . . ? 
C5 C21 C22 C23 -177.2(4) . . . . ? 
C21 C22 C23 C24 -2.1(7) . . . . ? 
C22 C23 C24 C25 1.4(8) . . . . ? 
C23 C24 C25 C26 0.6(8) . . . . ? 
C24 C25 C26 C21 -1.8(8) . . . . ? 
C22 C21 C26 C25 1.1(7) . . . . ? 
C5 C21 C26 C25 179.1(4) . . . . ? 
C1 Ir1 C31 C32 51.1(3) . . . . ? 
C10 Ir1 C31 C32 -120.9(4) . . . . ? 
C33 Ir1 C31 C32 -37.7(3) . . . . ? 
C34 Ir1 C31 C32 -81.7(3) . . . . ? 
C35 Ir1 C31 C32 -118.8(4) . . . . ? 
I2 Ir1 C31 C32 146.2(3) . . . . ? 
C1 Ir1 C31 C35 169.9(3) . . . . ? 
C10 Ir1 C31 C35 -2.1(5) . . . . ? 
C33 Ir1 C31 C35 81.1(3) . . . . ? 
C34 Ir1 C31 C35 37.2(3) . . . . ? 
C32 Ir1 C31 C35 118.8(4) . . . . ? 
I2 Ir1 C31 C35 -94.9(3) . . . . ? 
C1 Ir1 C31 C41 -71.8(6) . . . . ? 
C10 Ir1 C31 C41 116.1(6) . . . . ? 
C33 Ir1 C31 C41 -160.7(6) . . . . ? 
C34 Ir1 C31 C41 155.4(6) . . . . ? 
C35 Ir1 C31 C41 118.2(7) . . . . ? 
C32 Ir1 C31 C41 -122.9(7) . . . . ? 
I2 Ir1 C31 C41 23.3(5) . . . . ? 
C35 C31 C32 C33 -2.2(5) . . . . ? 
C41 C31 C32 C33 -177.0(5) . . . . ? 
Ir1 C31 C32 C33 58.4(3) . . . . ? 
C35 C31 C32 C42 174.8(5) . . . . ? 
C41 C31 C32 C42 0.0(8) . . . . ? 
Ir1 C31 C32 C42 -124.6(5) . . . . ? 
C35 C31 C32 Ir1 -60.6(3) . . . . ? 
C41 C31 C32 Ir1 124.6(5) . . . . ? 
C1 Ir1 C32 C31 -139.5(3) . . . . ? 
C10 Ir1 C32 C31 124.3(4) . . . . ? 
C33 Ir1 C32 C31 118.6(4) . . . . ? 
C34 Ir1 C32 C31 78.5(3) . . . . ? 
C35 Ir1 C32 C31 37.1(3) . . . . ? 
I2 Ir1 C32 C31 -41.5(3) . . . . ? 
C1 Ir1 C32 C33 101.9(3) . . . . ? 
C10 Ir1 C32 C33 5.7(5) . . . . ? 
C34 Ir1 C32 C33 -40.1(3) . . . . ? 
C35 Ir1 C32 C33 -81.5(3) . . . . ? 
C31 Ir1 C32 C33 -118.6(4) . . . . ? 
I2 Ir1 C32 C33 -160.1(2) . . . . ? 
C1 Ir1 C32 C42 -14.5(5) . . . . ? 
C10 Ir1 C32 C42 -110.8(5) . . . . ? 
C33 Ir1 C32 C42 -116.5(6) . . . . ? 
C34 Ir1 C32 C42 -156.6(5) . . . . ? 
C35 Ir1 C32 C42 162.0(5) . . . . ? 
C31 Ir1 C32 C42 124.9(6) . . . . ? 
I2 Ir1 C32 C42 83.5(5) . . . . ? 
C31 C32 C33 C34 4.8(5) . . . . ? 
C42 C32 C33 C34 -172.4(4) . . . . ? 
Ir1 C32 C33 C34 66.4(3) . . . . ? 
C31 C32 C33 C43 170.6(4) . . . . ? 
C42 C32 C33 C43 -6.6(7) . . . . ? 
Ir1 C32 C33 C43 -127.8(4) . . . . ? 
C31 C32 C33 Ir1 -61.6(3) . . . . ? 
C42 C32 C33 Ir1 121.2(5) . . . . ? 
C1 Ir1 C33 C32 -86.1(3) . . . . ? 
C10 Ir1 C33 C32 -176.8(3) . . . . ? 
C34 Ir1 C33 C32 113.5(4) . . . . ? 
C35 Ir1 C33 C32 77.8(3) . . . . ? 
C31 Ir1 C33 C32 35.6(3) . . . . ? 
I2 Ir1 C33 C32 45.6(4) . . . . ? 
C1 Ir1 C33 C34 160.4(3) . . . . ? 
C10 Ir1 C33 C34 69.7(3) . . . . ? 
C35 Ir1 C33 C34 -35.7(3) . . . . ? 
C32 Ir1 C33 C34 -113.5(4) . . . . ? 
C31 Ir1 C33 C34 -77.9(3) . . . . ? 
I2 Ir1 C33 C34 -68.0(4) . . . . ? 
C1 Ir1 C33 C43 37.4(4) . . . . ? 
C10 Ir1 C33 C43 -53.4(5) . . . . ? 
C34 Ir1 C33 C43 -123.0(5) . . . . ? 
C35 Ir1 C33 C43 -158.7(5) . . . . ? 
C32 Ir1 C33 C43 123.4(5) . . . . ? 
C31 Ir1 C33 C43 159.0(5) . . . . ? 
I2 Ir1 C33 C43 169.0(3) . . . . ? 
C32 C33 C34 C35 -5.6(5) . . . . ? 
C43 C33 C34 C35 -171.3(4) . . . . ? 
Ir1 C33 C34 C35 61.7(3) . . . . ? 
C32 C33 C34 C44 173.1(5) . . . . ? 
C43 C33 C34 C44 7.4(7) . . . . ? 
Ir1 C33 C34 C44 -119.6(5) . . . . ? 
C32 C33 C34 Ir1 -67.3(3) . . . . ? 
C43 C33 C34 Ir1 126.9(4) . . . . ? 
C1 Ir1 C34 C35 -148.9(3) . . . . ? 
C10 Ir1 C34 C35 123.1(3) . . . . ? 
C33 Ir1 C34 C35 -118.8(4) . . . . ? 
C32 Ir1 C34 C35 -79.1(3) . . . . ? 
C31 Ir1 C34 C35 -38.2(3) . . . . ? 
I2 Ir1 C34 C35 32.9(4) . . . . ? 
C1 Ir1 C34 C33 -30.1(4) . . . . ? 
C10 Ir1 C34 C33 -118.1(3) . . . . ? 
C35 Ir1 C34 C33 118.8(4) . . . . ? 
C32 Ir1 C34 C33 39.7(3) . . . . ? 
C31 Ir1 C34 C33 80.6(3) . . . . ? 
I2 Ir1 C34 C33 151.7(2) . . . . ? 
C1 Ir1 C34 C44 87.7(5) . . . . ? 
C10 Ir1 C34 C44 -0.3(4) . . . . ? 
C33 Ir1 C34 C44 117.8(5) . . . . ? 
C35 Ir1 C34 C44 -123.4(6) . . . . ? 
C32 Ir1 C34 C44 157.5(5) . . . . ? 
C31 Ir1 C34 C44 -161.6(5) . . . . ? 
I2 Ir1 C34 C44 -90.5(4) . . . . ? 
C33 C34 C35 C31 4.2(5) . . . . ? 
C44 C34 C35 C31 -174.4(5) . . . . ? 
Ir1 C34 C35 C31 63.4(3) . . . . ? 
C33 C34 C35 C45 -179.3(4) . . . . ? 
C44 C34 C35 C45 2.1(8) . . . . ? 
Ir1 C34 C35 C45 -120.1(5) . . . . ? 
C33 C34 C35 Ir1 -59.2(3) . . . . ? 
C44 C34 C35 Ir1 122.2(5) . . . . ? 
C32 C31 C35 C34 -1.3(5) . . . . ? 
C41 C31 C35 C34 173.7(5) . . . . ? 
Ir1 C31 C35 C34 -62.6(3) . . . . ? 
C32 C31 C35 C45 -177.7(4) . . . . ? 
C41 C31 C35 C45 -2.7(8) . . . . ? 
Ir1 C31 C35 C45 120.9(5) . . . . ? 
C32 C31 C35 Ir1 61.3(3) . . . . ? 
C41 C31 C35 Ir1 -123.7(5) . . . . ? 
C1 Ir1 C35 C34 91.1(6) . . . . ? 
C10 Ir1 C35 C34 -64.5(3) . . . . ? 
C33 Ir1 C35 C34 37.7(3) . . . . ? 
C32 Ir1 C35 C34 81.0(3) . . . . ? 
C31 Ir1 C35 C34 116.6(4) . . . . ? 
I2 Ir1 C35 C34 -154.7(3) . . . . ? 
C1 Ir1 C35 C31 -25.5(6) . . . . ? 
C10 Ir1 C35 C31 178.9(3) . . . . ? 
C33 Ir1 C35 C31 -78.9(3) . . . . ? 
C34 Ir1 C35 C31 -116.6(4) . . . . ? 
C32 Ir1 C35 C31 -35.7(3) . . . . ? 
I2 Ir1 C35 C31 88.7(3) . . . . ? 
C1 Ir1 C35 C45 -147.4(5) . . . . ? 
C10 Ir1 C35 C45 56.9(6) . . . . ? 
C33 Ir1 C35 C45 159.2(6) . . . . ? 
C34 Ir1 C35 C45 121.4(7) . . . . ? 
C32 Ir1 C35 C45 -157.6(6) . . . . ? 
C31 Ir1 C35 C45 -121.9(6) . . . . ? 
I2 Ir1 C35 C45 -33.2(5) . . . . ? 
 
_diffrn_measured_fraction_theta_max    0.983 
_diffrn_reflns_theta_full              27.52 
_diffrn_measured_fraction_theta_full   0.983 
_refine_diff_density_max    0.970 
_refine_diff_density_min   -0.973 
_refine_diff_density_rms    0.099 
